# Supplementary material for: Behaviour of zinc during the process of leaching copper from WPCBs by typical acidic ionic liquids
Source: Royal Society of Chemistry journal article supplement (doi:10.1039/c5ra02655e), 2015-01-01
Supplement: c5ra02655e1.pdf [file c5ra02655e1.pdf]

Supporting information for

## Behaviour of Zinc during the Process of Leaching Copper from WPCBs by Typical Ionic Liquid Acids

Mengjun Chen<sup>a,\*</sup>, Jiqin Wang<sup>a</sup>, Jinxiu Huang<sup>a</sup> and Haiyan Chen<sup>a</sup>,

<sup>a</sup> Key Laboratory of Solid Waste Treatment and Resource Recycle (SWUST), Ministry of Education, Southwest University of Science and Technology, 59 Qinglong Road, Mianyang, 621010, China. E-mail address: [kyling@swust.edu.cn](mailto:kyling@swust.edu.cn)

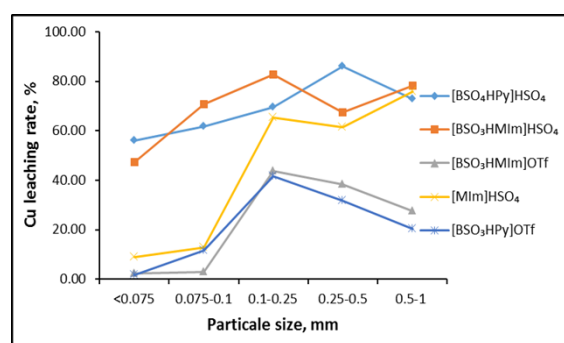

Fig. S1 Effect of particle size on copper leaching rate by ionic liquid acids

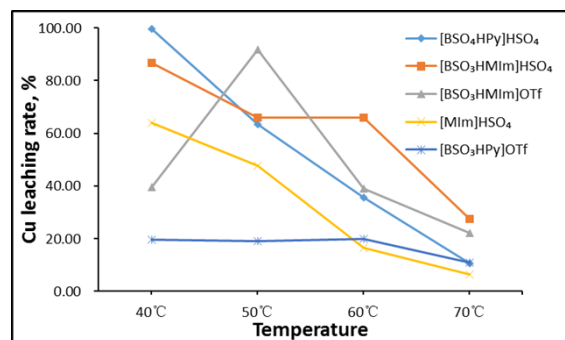

Fig. S2 Effect of temperature on copper leaching rate by ionic liquid acids

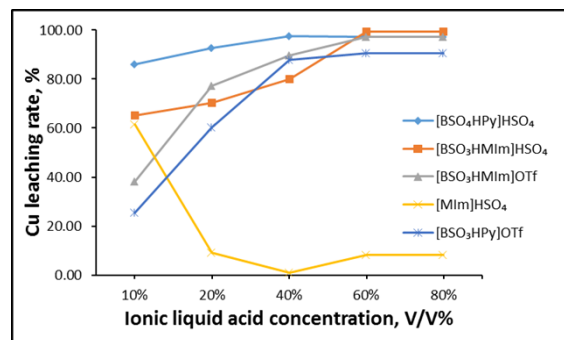

Fig. S3 Effect of ionic liquid acid concentration on copper leaching rate by ionic liquid acids

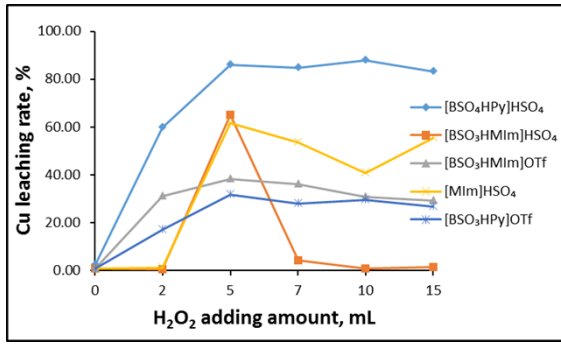

Fig. S4 Effect of H<sub>2</sub>O<sub>2</sub> adding amount on copper leaching rate by ionic liquid acids

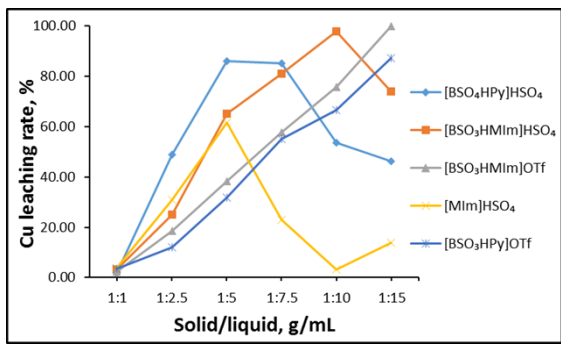

Fig. S5 Effect of solid/liquid on copper leaching rate by ionic liquid acids

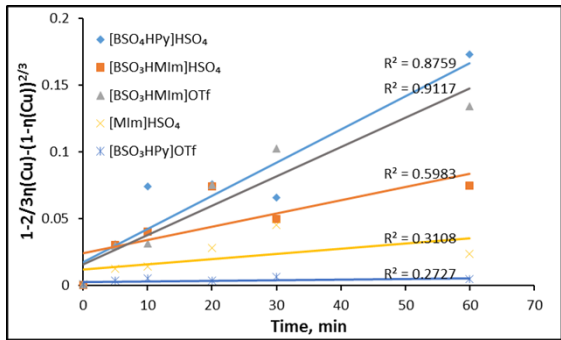

Fig. S6 Plots of shrinking core model for diffusion control
